# Supplementary material for: Effect of Harvesting Time Variations on Essential Oil Yield and Composition of Sage (Salvia officinalis)
Source: MDPI journal article supplement (doi:10.3390/horticulturae8020149), 2022-02-10
Supplement: s1 [file s1]

**Table S1.** Correlation between essential oil compounds

|    | Compounds            | 1     | 2     | 3     | 4     | 5     | 6     | 7     | 8     | 9     | 10    | 11    | 12    | 13    | 14    | 15    | 16    |
|----|----------------------|-------|-------|-------|-------|-------|-------|-------|-------|-------|-------|-------|-------|-------|-------|-------|-------|
| 1  | $\alpha$ -Pinene     | 1.00  |       |       |       |       |       |       |       |       |       |       |       |       |       |       |       |
| 2  | Camphene             | 0.61  | 1.00  |       |       |       |       |       |       |       |       |       |       |       |       |       |       |
| 3  | Sabinene             | -0.22 | -0.48 | 1.00  |       |       |       |       |       |       |       |       |       |       |       |       |       |
| 4  | $\beta$ -Pinene      | 0.35  | 0.59  | -0.20 | 1.00  |       |       |       |       |       |       |       |       |       |       |       |       |
| 5  | Myrcene              | -0.39 | -0.36 | -0.15 | -0.23 | 1.00  |       |       |       |       |       |       |       |       |       |       |       |
| 6  | Phellandrene         | 0.08  | 0.22  | -0.08 | 0.25  | -0.38 | 1.00  |       |       |       |       |       |       |       |       |       |       |
| 7  | $\alpha$ -Terpinene  | -0.11 | -0.17 | 0.24  | 0.11  | -0.15 | 0.38  | 1.00  |       |       |       |       |       |       |       |       |       |
| 8  | p-Cymene             | 0.38  | 0.59  | -0.11 | 0.80  | -0.45 | 0.30  | 0.25  | 1.00  |       |       |       |       |       |       |       |       |
| 9  | 1,8- cineol          | 0.02  | 0.41  | -0.44 | 0.47  | 0.01  | 0.04  | -0.03 | 0.42  | 1.00  |       |       |       |       |       |       |       |
| 10 | $\gamma$ -Terpinene  | 0.18  | -0.03 | 0.23  | 0.27  | -0.35 | 0.46  | 0.87  | 0.43  | -0.06 | 1.00  |       |       |       |       |       |       |
| 11 | cis-Sabinene hydrate | -0.46 | -0.47 | 0.46  | -0.36 | 0.02  | -0.14 | 0.02  | -0.19 | -0.34 | -0.09 | 1.00  |       |       |       |       |       |
| 12 | Terpinolene          | 0.29  | 0.32  | 0.25  | 0.50  | -0.50 | 0.42  | 0.48  | 0.66  | 0.11  | 0.69  | 0.03  | 1.00  |       |       |       |       |
| 13 | cis-Thujone          | -0.45 | -0.30 | -0.13 | -0.32 | 0.63  | -0.17 | 0.15  | -0.23 | -0.02 | 0.00  | 0.17  | -0.28 | 1.00  |       |       |       |
| 14 | trans -Thujone       | -0.03 | -0.33 | 0.44  | 0.12  | -0.05 | 0.20  | 0.31  | 0.05  | -0.33 | 0.35  | 0.45  | 0.24  | -0.10 | 1.00  |       |       |
| 15 | Camphor              | 0.38  | 0.85  | -0.43 | 0.58  | -0.48 | 0.30  | -0.16 | 0.58  | 0.52  | -0.01 | -0.32 | 0.41  | -0.36 | -0.40 | 1.00  |       |
| 16 | Borneol              | 0.37  | 0.78  | -0.41 | 0.51  | -0.34 | 0.17  | -0.12 | 0.56  | 0.39  | 0.08  | -0.31 | 0.42  | -0.24 | -0.29 | 0.86  | 1.00  |
| 17 | $\alpha$ -Terpineol  | -0.19 | -0.05 | -0.26 | -0.12 | 0.83  | -0.60 | -0.42 | -0.39 | 0.12  | -0.59 | -0.17 | -0.62 | 0.43  | -0.24 | -0.24 | -0.14 |
| 18 | trans -Carveol       | 0.12  | 0.26  | -0.11 | 0.28  | -0.37 | 0.98  | 0.38  | 0.33  | 0.10  | 0.46  | -0.19 | 0.45  | -0.18 | 0.17  | 0.32  | 0.20  |
| 19 | cis-Carveol          | 0.10  | -0.38 | 0.35  | -0.15 | 0.07  | 0.03  | 0.16  | -0.13 | -0.65 | 0.15  | 0.35  | -0.06 | -0.07 | 0.70  | -0.53 | -0.38 |
| 20 | Bornyl acetate       | 0.45  | 0.26  | 0.26  | 0.29  | -0.35 | 0.25  | 0.10  | 0.40  | -0.29 | 0.31  | -0.11 | 0.37  | -0.37 | 0.23  | 0.24  | 0.36  |
| 21 | Carvacrol            | 0.07  | 0.17  | -0.37 | 0.22  | 0.55  | -0.51 | -0.59 | -0.07 | 0.34  | -0.60 | -0.18 | -0.48 | 0.13  | -0.11 | 0.06  | 0.10  |
| 22 | (E)-Caryophyllene    | -0.13 | -0.45 | 0.61  | -0.30 | -0.21 | 0.21  | 0.37  | -0.12 | -0.59 | 0.32  | 0.47  | 0.16  | -0.06 | 0.35  | -0.32 | -0.36 |
| 23 | B-Gurjunene          | 0.28  | 0.03  | 0.18  | -0.06 | -0.38 | 0.06  | -0.07 | 0.13  | -0.45 | 0.01  | 0.33  | 0.06  | -0.26 | 0.29  | 0.01  | 0.09  |
| 24 | $\alpha$ -Humulene   | -0.13 | 0.32  | -0.60 | 0.00  | 0.17  | 0.23  | -0.12 | -0.01 | 0.36  | -0.22 | -0.25 | -0.08 | 0.04  | -0.53 | 0.42  | 0.44  |
| 25 | Ledene               | -0.03 | -0.05 | 0.19  | -0.02 | -0.31 | 0.18  | 0.23  | -0.07 | -0.41 | 0.24  | 0.37  | 0.27  | -0.29 | 0.38  | -0.01 | 0.00  |
| 26 | $\delta$ -Cadinene   | -0.16 | -0.43 | 0.31  | -0.11 | -0.11 | -0.17 | 0.14  | -0.04 | -0.30 | 0.13  | 0.33  | 0.10  | -0.33 | 0.48  | -0.37 | -0.22 |
| 27 | Spathulenol          | -0.03 | 0.01  | 0.37  | 0.17  | -0.43 | -0.12 | -0.05 | 0.24  | -0.06 | -0.03 | 0.32  | 0.28  | -0.50 | 0.00  | 0.23  | 0.16  |
| 28 | Caryophyllene oxide  | 0.15  | 0.10  | 0.30  | 0.12  | -0.41 | 0.05  | 0.28  | 0.35  | -0.08 | 0.21  | 0.19  | 0.35  | -0.49 | 0.07  | 0.16  | 0.16  |

|    |               |      |       |       |       |       |       |       |       |       |       |      |       |       |      |       |       |
|----|---------------|------|-------|-------|-------|-------|-------|-------|-------|-------|-------|------|-------|-------|------|-------|-------|
| 29 | Viridiflorol  | 0.02 | 0.06  | 0.35  | 0.28  | -0.35 | -0.18 | 0.07  | 0.33  | -0.09 | 0.06  | 0.29 | 0.27  | -0.52 | 0.17 | 0.16  | 0.16  |
| 30 | Ledol         | 0.30 | 0.02  | 0.36  | 0.06  | -0.13 | -0.22 | -0.11 | 0.03  | -0.36 | -0.03 | 0.08 | 0.17  | -0.49 | 0.16 | -0.04 | 0.13  |
| 31 | Manool        | 0.05 | -0.22 | 0.55  | 0.01  | -0.38 | -0.27 | -0.03 | 0.06  | -0.33 | -0.01 | 0.51 | 0.14  | -0.51 | 0.34 | -0.12 | -0.16 |
| 32 | 13-epi-Manool | 0.13 | -0.31 | -0.05 | -0.41 | 0.10  | -0.17 | -0.07 | -0.23 | -0.18 | -0.09 | 0.26 | -0.25 | 0.23  | 0.02 | -0.45 | -0.48 |

**Part b:** from of Table S1.

|    |                       | 17    | 18    | 19    | 20    | 21    | 22    | 23    | 24    | 25    | 26    | 27    | 28    | 29    | 30    | 31   | 32   |
|----|-----------------------|-------|-------|-------|-------|-------|-------|-------|-------|-------|-------|-------|-------|-------|-------|------|------|
| 17 | $\alpha$ -Terpineol   | 1.00  |       |       |       |       |       |       |       |       |       |       |       |       |       |      |      |
| 18 | <i>trans</i> -Carveol | -0.58 | 1.00  |       |       |       |       |       |       |       |       |       |       |       |       |      |      |
| 19 | <i>cis</i> -Carveol   | -0.11 | 0.00  | 1.00  |       |       |       |       |       |       |       |       |       |       |       |      |      |
| 20 | Bornyl acetate        | -0.33 | 0.27  | 0.40  | 1.00  |       |       |       |       |       |       |       |       |       |       |      |      |
| 21 | Carvacrol             | 0.79  | -0.49 | -0.12 | -0.19 | 1.00  |       |       |       |       |       |       |       |       |       |      |      |
| 22 | (E)-Caryophyllene     | -0.45 | 0.19  | 0.53  | 0.49  | -0.59 | 1.00  |       |       |       |       |       |       |       |       |      |      |
| 23 | $\beta$ -Gurjunene    | -0.40 | 0.05  | 0.61  | 0.53  | -0.21 | 0.52  | 1.00  |       |       |       |       |       |       |       |      |      |
| 24 | $\alpha$ -Humulene    | 0.16  | 0.28  | -0.39 | -0.09 | 0.07  | -0.33 | -0.26 | 1.00  |       |       |       |       |       |       |      |      |
| 25 | Ledene                | -0.41 | 0.15  | 0.42  | 0.14  | -0.50 | 0.36  | 0.37  | -0.04 | 1.00  |       |       |       |       |       |      |      |
| 26 | $\delta$ -Cadinene    | -0.24 | -0.17 | 0.51  | 0.15  | -0.24 | 0.24  | 0.18  | -0.13 | 0.46  | 1.00  |       |       |       |       |      |      |
| 27 | Spathulenol           | -0.31 | -0.11 | 0.10  | 0.35  | -0.22 | 0.38  | 0.43  | 0.03  | 0.46  | 0.35  | 1.00  |       |       |       |      |      |
| 28 | Caryophyllene oxide   | -0.41 | 0.08  | 0.19  | 0.47  | -0.36 | 0.51  | 0.46  | -0.03 | 0.22  | 0.35  | 0.63  | 1.00  |       |       |      |      |
| 29 | Viridiflorol          | -0.24 | -0.17 | 0.14  | 0.37  | -0.11 | 0.37  | 0.31  | -0.14 | 0.31  | 0.46  | 0.72  | 0.80  | 1.00  |       |      |      |
| 30 | Ledol                 | -0.11 | -0.19 | 0.32  | 0.55  | -0.07 | 0.38  | 0.42  | -0.10 | 0.20  | 0.41  | 0.48  | 0.63  | 0.69  | 1.00  |      |      |
| 31 | Manool                | -0.31 | -0.29 | 0.34  | 0.30  | -0.17 | 0.55  | 0.46  | -0.45 | 0.37  | 0.48  | 0.68  | 0.63  | 0.83  | 0.64  | 1.00 |      |
| 32 | 13-epi-Manool <       | 0.03  | -0.17 | 0.21  | -0.21 | -0.02 | 0.14  | 0.18  | -0.13 | -0.10 | -0.09 | -0.12 | -0.15 | -0.25 | -0.12 | 0.13 | 1.00 |

**Table S2.** Mean comparison between different groups derived from cluster analysis in *S. officinalis* plants.

| No | Compounds                    | Groups                        |                                  |                                   |                               |                               |                                |
|----|------------------------------|-------------------------------|----------------------------------|-----------------------------------|-------------------------------|-------------------------------|--------------------------------|
|    |                              | G1                            | G2                               | G3                                | G4                            | G5                            | G6                             |
| 1  | $\alpha$ -Pinene             | 3.70 $\pm$ (nd) <sup>ab</sup> | 3.79 $\pm$ (0.08) <sup>ab</sup>  | 3.39 $\pm$ (0.21) <sup>ab</sup>   | 3.17 $\pm$ (nd) <sup>ab</sup> | 4.32 $\pm$ (nd) <sup>a</sup>  | 2.99 $\pm$ (nd) <sup>b</sup>   |
| 2  | Camphene                     | 3.11 $\pm$ (nd) <sup>bc</sup> | 4.00 $\pm$ (0.09) <sup>ab</sup>  | 3.63 $\pm$ (0.15) <sup>bc</sup>   | 3.01 $\pm$ (nd) <sup>c</sup>  | 4.82 $\pm$ (nd) <sup>a</sup>  | 3.10 $\pm$ (nd) <sup>bc</sup>  |
| 3  | Sabinene                     | 0.24 $\pm$ (nd) <sup>a</sup>  | 0.25 $\pm$ (0.02) <sup>a</sup>   | 0.25 $\pm$ (0.02) <sup>a</sup>    | 0.29 $\pm$ (nd) <sup>a</sup>  | 0.22 $\pm$ (nd) <sup>a</sup>  | 0.25 $\pm$ (nd) <sup>a</sup>   |
| 4  | $\beta$ --Pinene             | 2.43 $\pm$ (nd) <sup>a</sup>  | 2.68 $\pm$ (0.08) <sup>a</sup>   | 2.61 $\pm$ (0.04) <sup>a</sup>    | 2.55 $\pm$ (nd) <sup>a</sup>  | 3.05 $\pm$ (nd) <sup>b</sup>  | 2.54 $\pm$ (nd) <sup>a</sup>   |
| 5  | Myrcene                      | 1.94 $\pm$ (nd) <sup>a</sup>  | 1.59 $\pm$ (0.05) <sup>a</sup>   | 2.10 $\pm$ (0.16) <sup>a</sup>    | 1.68 $\pm$ (nd) <sup>a</sup>  | 1.53 $\pm$ (nd) <sup>a</sup>  | 2.32 $\pm$ (nd) <sup>a</sup>   |
| 6  | Phellandrene                 | 0.00 $\pm$ (nd) <sup>a</sup>  | 0.04 $\pm$ (0.02) <sup>a</sup>   | 0.01 $\pm$ (0.01) <sup>a</sup>    | 0.00 $\pm$ (nd) <sup>a</sup>  | 0.00 $\pm$ (nd) <sup>a</sup>  | 0.00 $\pm$ (nd) <sup>a</sup>   |
| 7  | $\alpha$ -Terpinene          | 0.19 $\pm$ (nd) <sup>a</sup>  | 0.21 $\pm$ (0.00) <sup>a</sup>   | 0.18 $\pm$ (0.03) <sup>a</sup>    | 0.20 $\pm$ (nd) <sup>a</sup>  | 0.00 $\pm$ (nd) <sup>b</sup>  | 0.22 $\pm$ (nd) <sup>a</sup>   |
| 8  | $\rho$ -Cymene               | 0.28 $\pm$ (nd) <sup>b</sup>  | 0.32 $\pm$ (0.02) <sup>ab</sup>  | 0.30 $\pm$ (0.01) <sup>b</sup>    | 0.30 $\pm$ (nd) <sup>ab</sup> | 0.37 $\pm$ (nd) <sup>a</sup>  | 0.29 $\pm$ (nd) <sup>b</sup>   |
| 9  | 1,8- cineol                  | 9.63 $\pm$ (nd) <sup>a</sup>  | 10.35 $\pm$ (0.27) <sup>a</sup>  | 9.70 $\pm$ (0.33) <sup>a</sup>    | 9.37 $\pm$ (nd) <sup>a</sup>  | 10.85 $\pm$ (nd) <sup>a</sup> | 11.07 $\pm$ (nd) <sup>a</sup>  |
| 10 | $\gamma$ -Terpinene          | 0.41 $\pm$ (nd) <sup>a</sup>  | 0.45 $\pm$ (0.01) <sup>a</sup>   | 0.41 $\pm$ (0.03) <sup>a</sup>    | 0.45 $\pm$ (nd) <sup>a</sup>  | 0.39 $\pm$ (nd) <sup>a</sup>  | 0.41 $\pm$ (nd) <sup>a</sup>   |
| 11 | <i>cis</i> -Sabinene hydrate | 0.21 $\pm$ (nd) <sup>a</sup>  | 0.16 $\pm$ (0.01) <sup>a</sup>   | 0.19 $\pm$ (0.01) <sup>a</sup>    | 0.21 $\pm$ (nd) <sup>a</sup>  | 0.16 $\pm$ (nd) <sup>a</sup>  | 0.17 $\pm$ (nd) <sup>a</sup>   |
| 12 | Terpinolene                  | 0.20 $\pm$ (nd) <sup>a</sup>  | 0.25 $\pm$ (0.01) <sup>a</sup>   | 0.22 $\pm$ (0.01) <sup>a</sup>    | 0.23 $\pm$ (nd) <sup>a</sup>  | 0.23 $\pm$ (nd) <sup>a</sup>  | 0.20 $\pm$ (nd) <sup>a</sup>   |
| 13 | <i>cis</i> -Thujone          | 42.22 $\pm$ (nd) <sup>b</sup> | 37.79 $\pm$ (0.43) <sup>c</sup>  | 40.31 $\pm$ (0.28) <sup>b</sup>   | 36.93 $\pm$ (nd) <sup>c</sup> | 34.38 $\pm$ (nd) <sup>d</sup> | 46.18 $\pm$ (nd) <sup>a</sup>  |
| 14 | <i>trans</i> -Thujone        | 10.38 $\pm$ (nd) <sup>b</sup> | 10.21 $\pm$ (0.56) <sup>b</sup>  | 10.43 $\pm$ (0.33) <sup>b</sup>   | 14.19 $\pm$ (nd) <sup>a</sup> | 10.29 $\pm$ (nd) <sup>b</sup> | 10.28 $\pm$ (nd) <sup>b</sup>  |
| 15 | Camphor                      | 9.65 $\pm$ (nd) <sup>c</sup>  | 13.14 $\pm$ (0.18) <sup>ab</sup> | 11.82 $\pm$ (0.50) <sup>a-c</sup> | 10.10 $\pm$ (nd) <sup>c</sup> | 14.38 $\pm$ (nd) <sup>a</sup> | 10.34 $\pm$ (nd) <sup>bc</sup> |
| 16 | Borneol                      | 1.18 $\pm$ (nd) <sup>b</sup>  | 1.54 $\pm$ (0.06) <sup>ab</sup>  | 1.46 $\pm$ (0.06) <sup>ab</sup>   | 1.32 $\pm$ (nd) <sup>ab</sup> | 1.70 $\pm$ (nd) <sup>a</sup>  | 1.26 $\pm$ (nd) <sup>b</sup>   |
| 17 | $\alpha$ -Terpineol          | 0.68 $\pm$ (nd) <sup>a</sup>  | 0.53 $\pm$ (0.02) <sup>a</sup>   | 0.83 $\pm$ (0.11) <sup>a</sup>    | 0.55 $\pm$ (nd) <sup>a</sup>  | 0.67 $\pm$ (nd) <sup>a</sup>  | 0.90 $\pm$ (nd) <sup>a</sup>   |
| 18 | <i>trans</i> -Carveol        | 0.00 $\pm$ (nd) <sup>a</sup>  | 0.04 $\pm$ (0.02) <sup>a</sup>   | 0.01 $\pm$ (0.01) <sup>a</sup>    | 0.00 $\pm$ (nd) <sup>a</sup>  | 0.00 $\pm$ (nd) <sup>a</sup>  | 0.00 $\pm$ (nd) <sup>a</sup>   |
| 19 | <i>cis</i> -Carveol          | 0.07 $\pm$ (nd) <sup>a</sup>  | 0.02 $\pm$ (0.02) <sup>a</sup>   | 0.03 $\pm$ (0.01) <sup>a</sup>    | 0.09 $\pm$ (nd) <sup>a</sup>  | 0.00 $\pm$ (nd) <sup>a</sup>  | 0.00 $\pm$ (nd) <sup>a</sup>   |

|    |                     |                           |                             |                              |                          |                           |                           |
|----|---------------------|---------------------------|-----------------------------|------------------------------|--------------------------|---------------------------|---------------------------|
| 20 | Bornyl acetate      | 0.84 ± (nd) <sup>a</sup>  | 0.96 ± (0.02) <sup>a</sup>  | 0.90 ± (0.04) <sup>a</sup>   | 0.92 ± (nd) <sup>a</sup> | 0.91 ± (nd) <sup>a</sup>  | 0.75 ± (nd) <sup>a</sup>  |
| 21 | Carvacrol           | 0.22 ± (nd) <sup>b</sup>  | 0.16 ± (0.02) <sup>b</sup>  | 0.29 ± (0.05) <sup>ab</sup>  | 0.15 ± (nd) <sup>b</sup> | 0.54 ± (nd) <sup>a</sup>  | 0.32 ± (nd) <sup>ab</sup> |
| 22 | E -Caryophyllene    | 1.91 ± (nd) <sup>a</sup>  | 1.86 ± (0.15) <sup>a</sup>  | 1.72 ± (0.17) <sup>a</sup>   | 2.00 ± (nd) <sup>a</sup> | 1.10 ± (nd) <sup>a</sup>  | 1.31 ± (nd) <sup>a</sup>  |
| 23 | β -Gurjunene        | 0.24 ± (nd) <sup>a</sup>  | 0.23 ± (0.02) <sup>a</sup>  | 0.21 ± (0.02) <sup>a</sup>   | 0.24 ± (nd) <sup>a</sup> | 0.23 ± (nd) <sup>a</sup>  | 0.12 ± (nd) <sup>a</sup>  |
| 24 | α -Humulene         | 2.48 ± (nd) <sup>a</sup>  | 2.43 ± (0.23) <sup>a</sup>  | 2.37 ± (0.22) <sup>a</sup>   | 2.86 ± (nd) <sup>a</sup> | 2.17 ± (nd) <sup>a</sup>  | 1.55 ± (nd) <sup>a</sup>  |
| 25 | Ledene              | 0.19 ± (nd) <sup>ab</sup> | 0.21 ± (0.02) <sup>ab</sup> | 0.20 ± (0.01) <sup>ab</sup>  | 0.25 ± (nd) <sup>a</sup> | 0.18 ± (nd) <sup>ab</sup> | 0.14 ± (nd) <sup>b</sup>  |
| 26 | δ -Cadinene         | 0.00 ± (nd) <sup>b</sup>  | 0.00 ± (0.00) <sup>b</sup>  | 0.00 ± (0.00) <sup>b</sup>   | 0.07 ± (nd) <sup>a</sup> | 0.00 ± (nd) <sup>b</sup>  | 0.00 ± (nd) <sup>b</sup>  |
| 27 | Spathulenol         | 0.16 ± (nd) <sup>ab</sup> | 0.18 ± (0.01) <sup>ab</sup> | 0.16 ± (0.01) <sup>ab</sup>  | 0.19 ± (nd) <sup>a</sup> | 0.18 ± (nd) <sup>ab</sup> | 0.11 ± (nd) <sup>b</sup>  |
| 28 | Caryophyllene oxide | 0.45 ± (nd) <sup>a</sup>  | 0.54 ± (0.04) <sup>a</sup>  | 0.47 ± (0.01) <sup>a</sup>   | 0.56 ± (nd) <sup>a</sup> | 0.49 ± (nd) <sup>a</sup>  | 0.31 ± (nd) <sup>b</sup>  |
| 29 | Viridiflorol        | 2.04 ± (nd) <sup>bc</sup> | 2.44 ± (0.19) <sup>ab</sup> | 2.39 ± (0.10) <sup>a-c</sup> | 2.98 ± (nd) <sup>a</sup> | 2.79 ± (nd) <sup>ab</sup> | 1.59 ± (nd) <sup>c</sup>  |
| 30 | Ledol               | 0.66 ± (nd) <sup>a</sup>  | 0.71 ± (0.03) <sup>a</sup>  | 0.69 ± (0.03) <sup>a</sup>   | 0.80 ± (nd) <sup>a</sup> | 0.72 ± (nd) <sup>a</sup>  | 0.34 ± (nd) <sup>b</sup>  |
| 31 | Manool              | 2.74 ± (nd) <sup>a</sup>  | 2.38 ± (0.43) <sup>ab</sup> | 2.31 ± (0.23) <sup>ab</sup>  | 3.67 ± (nd) <sup>a</sup> | 3.06 ± (nd) <sup>a</sup>  | 0.82 ± (nd) <sup>b</sup>  |
| 32 | 13-epi -Manool      | 1.10 ± (nd) <sup>a</sup>  | 0.00 ± (0.00) <sup>b</sup>  | 0.00 ± (0.00) <sup>b</sup>   | 0.00 ± (nd) <sup>b</sup> | 0.00 ± (nd) <sup>b</sup>  | 0.00 ± (nd) <sup>b</sup>  |

Means followed by common letter are not significantly different at the level of 5% (Duncan's multiple range test).
